# Supplementary material for: Spontaneous Intestinal Tumorigenesis inApc/Min+Mice Requires Altered T Cell Development with IL-17A
Source: Hindawi journal article supplement (doi:10.1155/2015/860106), 2015-01-01

## Supplementary Figure 1

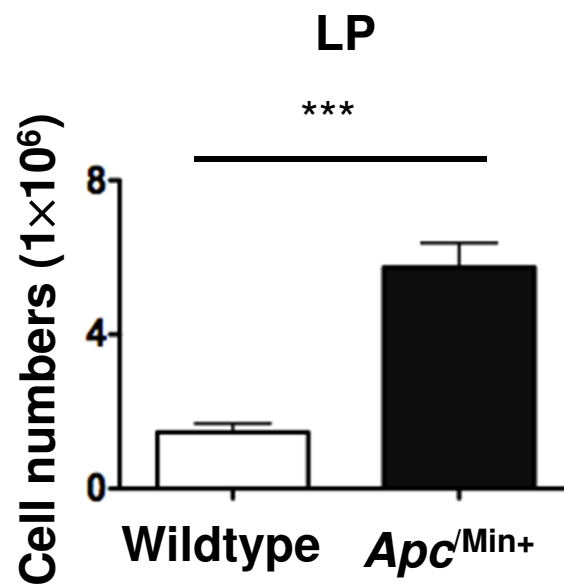

# Supplementary Figure 2

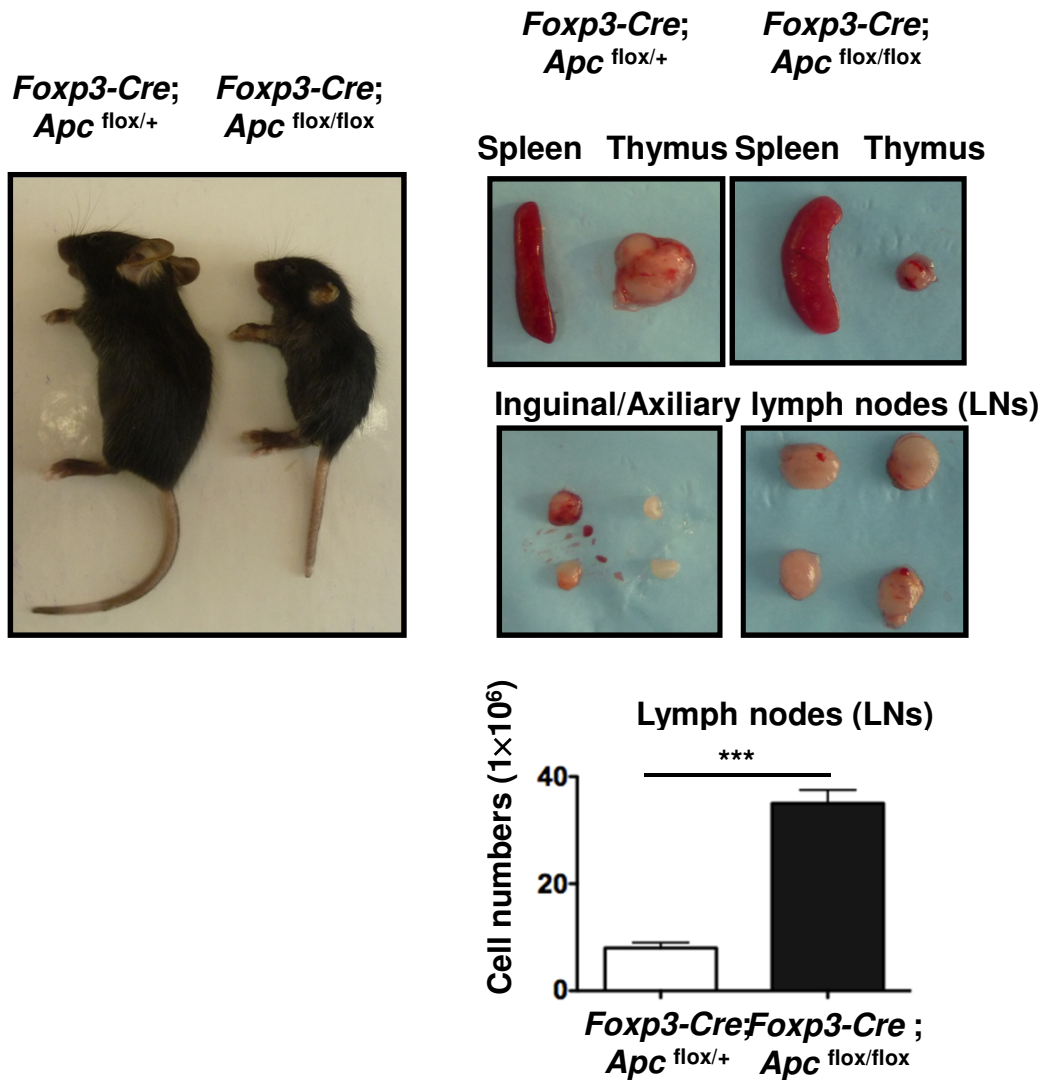

## Supplementary Figure 3

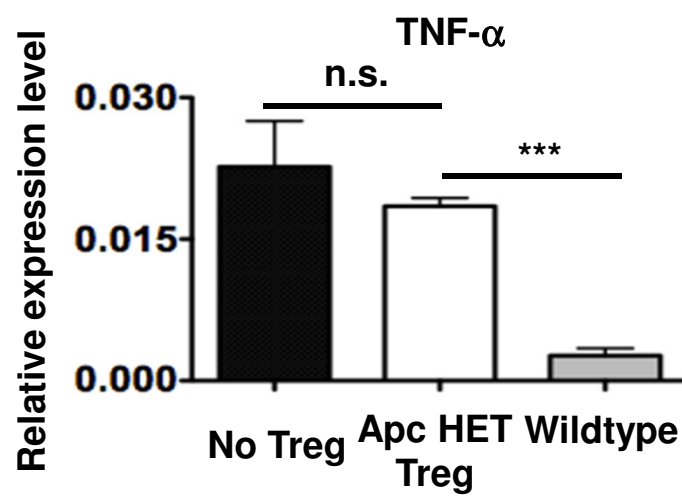

Supplement: f1 [file 860106.f1.pdf]
